# Supplementary figures and images for: Fire regimes and management options in mixed grassland-fynbos vegetation, South Africa
Source: Springer Nature journal article supplement (doi:10.1186/s42408-024-00262-2), 2024-03-18

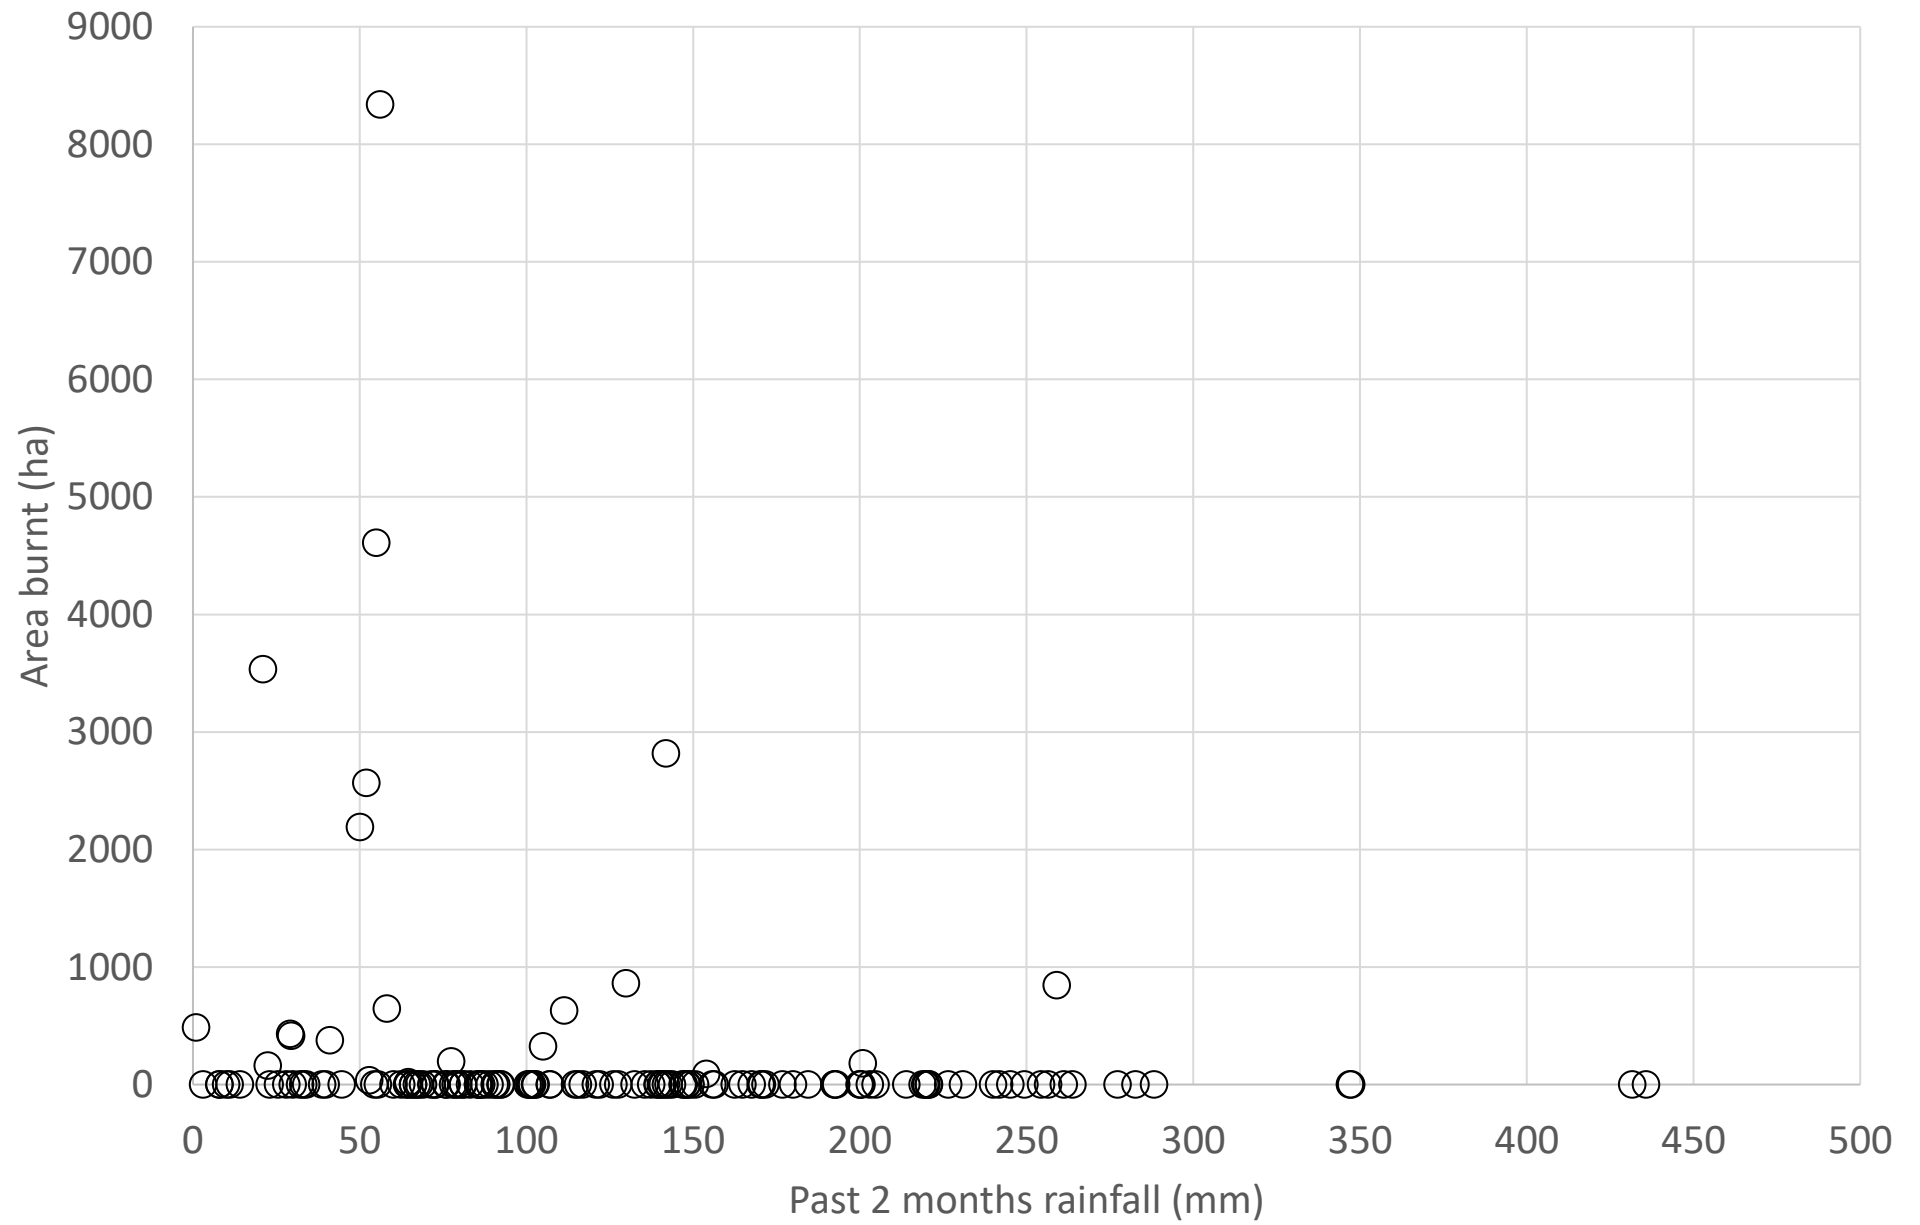

Supplement: 42408_2024_262_MOESM1_ESM.pdf [file 42408_2024_262_MOESM1_ESM.pdf]
